# Supplementary material for: Mode of action and membrane specificity of the antimicrobial peptide snakin-2
Source: PeerJ. 2016 May 10;4:e1987. doi: 10.7717/peerj.1987 (PMC4867707; doi:10.7717/peerj.1987)
Supplement: Figure S1 [file peerj-04-1987-s001.xlsx]

## Sheet: Tabelle1
	E.coli	Time-Kill						B.subtilis	Time-Kill						S. cerevisiae	Time-Kill
	Control	cfu/ml						Control	cfu/ml						Control	cfu/ml
	t [h]	1	2	3	Mean	StD		t [h]	1	2	3	Mean	StD		t [h]	1	2	3	Mean	StD
	0	525000	516000	531000	524000	7549.83		0	485000	524000	513000	507333	20108		0	251000	237000	246000	244667	7094.6
	0.16	763000	678000	758000	733000	47697		0.5	487000	536000	527000	516667	26083.2		0.5	273000	235000	257000	255000	19078.8
	0.5	754000	729000	795000	759333	33321.7		1	764000	905000	913000	860667	83811.3		1	342000	308000	353000	334333	23459.2
	1	1063000	1103000	1187000	1.11767e+06	63287.7		3	5430000	5210000	6240000	5.62667e+06	542433		3	820000	620000	750000	730000	101489
	3	1596000	1343000	1483000	1474000	126740		6	150000000	184000000	192000000	1.75333e+08	2.2301e+07		6	2944000	2480000	3150000	2858000	343179
	6	1809000	1716000	1963000	1.82933e+06	124749		9	498000000	512000000	632000000	5.47333e+08	7.36569e+07		9	4908000	6720000	7360000	6.32933e+06	1.27183e+06
	24	478400000	499000000	500200000	4.92533e+08	1.22545e+07		24	2200000000	2370000000	2490000000	2.35333e+09	1.45717e+08		24	1811200000	2316800000	2841300000	2323100000	5.15079e+08
	E.coli	Time-Kill						B.subtilis	Time-Kill						S. cerevisiae	Time-Kill
	2 x MIC	cfu/ml						2 x MIC	cfu/ml						2 x MIC	cfu/ml
	t [h]	1	2	3	Mean	StD		t [h]	1	2	3	Mean	StD		t [h]	1	2	3	Mean	StD
	0	514000	483000	521000	506000	20223.7		0	505000	473000	528000	502000	27622.5		0	243000	197000	249000	229667	28448.8
	0.16	549000	476000	519000	514667	36692.4		0.5	136000	140000	142000	139333	3055.05		0.5	29000	49000	53000	43666.7	12858.2
	0.5	414000	444000	421000	426333	15695		1	128000	92000	132000	117333	22030.3		1	5000	6000	7000	6000	1000
	1	360000	370000	284000	338000	47031.9		3	136000	142000	126000	134667	8082.9		3	6000	12000	13000	10333.3	3785.94
	3	38000	27000	26300	30433.3	6562.27		6	648000	784000	563000	665000	111476		6	5000	8000	7000	6666.67	1527.53
	6	10000	12000	9000	10333.3	1527.53		9	1040000	748000	695000	827667	185786		9	2000	3000	4000	3000	1000
	24	1	1	1	1	0		24	1000	1000	1000	1000	0		24	480	590	680	583.333	100.167
	E.coli	Time-Kill						B.subtilis	Time-Kill						S. cerevisiae	Time-Kill
	1 x MIC	cfu/ml						1 x MIC	cfu/ml						1 x MIC	cfu/ml
	t [h]	1	2	3	Mean	StD		t [h]	1	2	3	Mean	StD		t [h]	1	2	3	Mean	StD
	0	498000	533000	541000	524000	22869.2		0	520000	493000	552000	521667	29535.3		0	273000	177000	269000	239667	54307.8
	0.16	542000	488000	519000	516333	27098.6		0.5	304000	200000	276000	260000	53814.5		0.5	8000	18000	15000	13666.7	5131.6
	0.5	544000	464000	486000	498000	41328		1	408000	456000	370000	411333	43096.8		1	38000	33000	42000	37666.7	4509.25
	1	510000	477000	452000	479667	29091.8		3	576000	784000	543000	634333	130661		3	73000	112000	84000	89666.7	20108
	3	188000	156000	129000	157667	29535.3		6	6220000	13300000	3420000	7.64667e+06	5.09216e+06		6	60000	112000	90000	87333.3	26102.4
	6	164000	136000	108000	136000	28000		9	16800000	8650000	12800000	12750000	4.07523e+06		9	170000	208000	194000	190667	19218
	24	2000000	2080000	1950000	2010000	65574.4		24	15600000	17500000	186000000	7.30333e+07	9.78366e+07		24	5440000	4032000	4240000	4.57067e+06	760014
	E.coli	Time-Kill						B.subtilis	Time-Kill						S. cerevisiae	Time-Kill
	1/2 x MIC	cfu/ml						1/2 x MIC	cfu/ml						1/2 x MIC	cfu/ml
	t [h]	1	2	3	Mean	StD		t [h]	1	2	3	Mean	StD		t [h]	1	2	3	Mean	StD
	0	484000	539000	509000	510667	27537.9		0	525000	438000	529000	497333	51423.1		0	223000	287000	254000	254667	32005.2
	0.16	546000	508000	524000	526000	19078.8		0.5	494000	512000	535000	513667	20550.8		0.5	19000	27000	29000	25000	5291.5
	0.5	648000	584000	593000	608333	34645.8		1	736000	664000	742000	714000	43405.1		1	64000	48000	73000	61666.7	12662.3
	1	776000	792000	829000	799000	27184.6		3	2890000	3810000	3950000	3550000	575847		3	138000	162000	172000	157333	17473.8
	3	950000	890000	1010000	950000	60000		6	38400000	28400000	41200000	36000000	6.72904e+06		6	364000	536000	438000	446000	86278.6
	6	1500000	1670000	1830000	1.66667e+06	165025		9	372000000	304000000	397000000	3.57667e+08	4.81283e+07		9	608000	1552000	1398000	1186000	506450
	24	428000000	392000000	472000000	4.30667e+08	4.00666e+07		24	2680000000	3760000000	4310000000	3.58333e+09	8.29237e+08		24	819200000	1152000000	1271000000	1.08073e+09	2.34179e+08
	E.coli	Time-Kill						B.subtilis	Time-Kill						S. cerevisiae	Time-Kill
	1/4 x MIC	cfu/ml						1/4 x MIC	cfu/ml						1/4 x MIC	cfu/ml
	t [h]	1	2	3	Mean	StD		t [h]	1	2	3	Mean	StD		t [h]	1	2	3	Mean	StD
	0	464000	497000	503000	488000	21000		0	581000	495000	486000	520667	52443.6		0	243000	277000	239000	253000	20880.6
	0.16	674000	664000	702000	680000	19697.7		0.5	488000	664000	591000	581000	88425.1		0.5	112000	160000	194000	155333	41198.7
	0.5	734000	669000	754000	719000	44441		1	704000	896000	988000	862667	144905		1	259000	352000	382000	331000	64132.7
	1	892000	1050000	1030000	990667	86031		3	4210000	5070000	5060000	4780000	493660		3	408000	472000	503000	461000	48445.8
	3	1448000	1080000	1370000	1.29933e+06	193911		6	9200000	130000000	140000000	9.30667e+07	7.28026e+07		6	1616000	1240000	1580000	1.47867e+06	207474
	6	1592000	1632000	1720000	1648000	65482.8		9	448000000	461000000	492000000	467000000	2.26053e+07		9	2592000	2880000	2940000	2804000	186032
	24	493000000	446000000	397000000	4.45333e+08	4.80035e+07		24	2060000000	2250000000	2320000000	2210000000	1.34536e+08		24	1632000000	1952000000	2031000000	1.87167e+09	2.11283e+08
