# Supplementary material for: Mode of action and membrane specificity of the antimicrobial peptide snakin-2
Source: PeerJ. 2016 May 10;4:e1987. doi: 10.7717/peerj.1987 (PMC4867707; doi:10.7717/peerj.1987)
Supplement: Figure S4 [file peerj-04-1987-s004.xlsx]

## Sheet: Tabelle1
		A (570 nm)			% Hemolysis
	µM SN2	1	2	3	1	2	3	Mean	St.D
	35	0.129	0.175	0.123	90.2098	111.465	93.1818	98.2855	11.5101
	17	0.034	0.052	0.043	23.7762	33.121	32.5758	29.8243	5.24491
	8.5	0.003	0.006	0.002	2.0979	3.82166	1.51515	2.47824	1.19937
	4.25	0.006	0.006	0.001	4.1958	3.82166	0.757576	2.92501	1.88635
	2.12	0.008	0.005	0	5.59441	3.18471	0	2.92637	2.80614
	1.06	0	0	0.001	0	0	0.757576	0.252525	0.437387
	0.53	0	0.002	0.003	0	1.27389	2.27273	1.1822	1.13913
	0,4 M Mannitol	0	0	0	0	0	0	0	0
	1% SDS	0.143	0.157	0.132	100	100	100	100	0
